1        **Reduced virulence and enhanced host adaption during antibiotics therapy: A**  
2 **story of a within-host carbapenem-resistant *Klebsiella pneumoniae* sequence type**  
3 **11 evolution in a fatal scrotal abscess patient**

4

5 Meiping Ye<sup>1#</sup>, Chunjie Liao<sup>2#</sup>, Mengya Shang<sup>2#</sup>, Danyang Zou<sup>1</sup>, Jingmin Yan<sup>2</sup>,  
6 Zhixiang Hu<sup>1</sup>, Xiaogang Xu<sup>3</sup>, Jianping Jiang<sup>3\*</sup>, Pingyu Zhou<sup>1,2\*</sup>

7

8 <sup>1</sup>STD Institute, Shanghai Skin Disease Hospital, Tongji University School of  
9 Medicine, Shanghai, China

10 <sup>2</sup>Shanghai Skin Disease Hospital, Clinical School of Anhui Medical University,  
11 Shanghai, China.

12 <sup>3</sup>Institute of Antibiotics, Huashan Hospital, Fudan University, Shanghai 200040,  
13 China.

14

15 Running Head: Within-host evolution of ST11-CRKP

16

17

18 \*Address correspondence to Pingyu Zhou, [zhoupingyu@medmail.com.cn](mailto:zhoupingyu@medmail.com.cn) and  
19 Jianping Jiang, [jiangjianping@fudan.edu.cn](mailto:jiangjianping@fudan.edu.cn).

20

# 1 ABSTRACT

2 Carbapenem-resistant *Klebsiella pneumoniae* (CRKP) has disseminated globally and  
3 become a major threat to human life. The sequence type (ST) 11 CRKP is a dominant  
4 clone in Asia, especially China, but how this clone evolves *in vivo*, then adapts to host  
5 and facilitates dissemination remain largely unknown. We analyzed the genomic  
6 dynamics of 4 ST11-CRKP isolates sequentially isolated from the urine of a patient with  
7 initial fatal scrotal abscess and finally recovered without effective medication. Genomic  
8 differences were identified and their implications for pathogenesis and host adaptation  
9 were investigated. The related transcriptional pathways were further explored by  
10 RNA-Seq. Genomic analysis identified 4-24 mutations and 94%-100% were  
11 synonymous or intergenic. The mutation rate of ST11-CRKP was  $2.1 \times 10^{-6}$ - $1.7 \times 10^{-5}$   
12 substitutions/site/year over 47 days of antibiotics therapy. During this period, CRKP  
13 underwent several adaptive changes including tigecycline resistance and virulence  
14 attenuation. Tigecycline resistance was caused by *ramR* ribosomal binding site (RBS)  
15 deletion, which has been described by us previously. In this study, we demonstrated  
16 that mutations associated with acyltransferase (*act*) and *ompK26* caused the virulence  
17 attenuation of ST11-CRKP. *act* deletion reduced the production of capsular  
18 polysaccharide and enhanced biofilm formation. RNA-Seq analysis revealed that *act*  
19 influenced the expression of *ldhA*, *bglX*, *mtnK* and *metE* which likely participate in  
20 capsular synthesis and biofilm formation. *ompK26* affected the virulence by its  
21 overexpression caused by the deletion of upstream repressor binding site. Our finding  
22 suggested that the broad genomic diversity, high evolutionary capacity and rapid  
23 within-host adaptability of ST11-CRKP might contribute to the worldwide  
24 dissemination of this clone.

25

## 26 IMPORTANCE

27 Carbapenem-resistant *Klebsiella pneumoniae* (CRKP) has disseminated worldwide and  
28 can cause life threatening infections, including pneumonia, bloodstream infections,  
29 urinary tract infections, intra-abdominal infection, liver abscess and meningitis. CRKP

1 infection is the leading cause of high mortality in clinical. The sequence type (ST) 11  
2 CRKP is a dominant clone and accounts for 60% of CRKP infections in China. Recently,  
3 the ST11-CRKP with high transmissibility are increasingly identified. Understanding  
4 how this clone evolved is crucial in controlling its further dissemination. The  
5 significance of our research is identifying the *in vivo* genomic dynamics of ST11-CRKP  
6 and the genetic basis for ST11-CRKP to facilitate persistence and dissemination, which  
7 will has broader biomedical impacts on understanding of ST11-CRKP dissemination.  
8 Furthermore, our study also highlights the importance of monitoring the development of  
9 variation in antibiotics susceptibility and virulence of bacteria in clinical practice,  
10 considering that pathogens can rapidly adapt to host during the treatment.

11 **Keywords**

12 Genomic study; *in vivo* evolution; host adaptation; RNA-Seq.

13

# 1 INTRODUCTION

2 The worldwide dissemination of carbapenem-resistant *Enterobacteriaceae* (CRE) has  
3 become an urgent threat to public health (1) and CRE has been classified as critical on  
4 the global priority pathogens list by the World Health Organization (2).  
5 Carbapenem-resistant *Klebsiella pneumoniae* (CRKP) is the most common genus of  
6 CRE. Study showed that CRKP infection accounts for 80% of CRE infection and is the  
7 leading cause of high mortality in clinical infections (3).

8 Most of the CRKP belong to the clonal group CG258, in which sequence type (ST)  
9 258 and ST11 are dominant (4). *K. pneumoniae* ST11 is the predominant clone in Asia  
10 and accounts for 60% of CRKP in China (5). Recently, a subclone of ST11-CRKP with  
11 high transmissibility is increasingly identified in China (6). Though with the extensive  
12 interrogations, the evolutionary success of ST11-CRKP for dissemination is not fully  
13 understood. The known factors impacting the dissemination includes resistance to  
14 carbapenem, high transmissibility, pathogenicity alternation and increased duration (7, 8).  
15 Besides, host adaptation or adaptability played a crucial role in clone transmission, which  
16 was highlighted by a study on the long-term carriage of ST258-CRKP within a patient  
17 (9). However, little is known about the within-host adaptation of ST11-CRKP in  
18 genomic and transcriptomic scales.

19 In this study, we analyzed the within-host evolution of ST11-CRKP isolated from  
20 the urine of a patient with initial fatal scrotal abscess and finally recovered without  
21 effective medication. During this course, the ST11-CRKP incurred a series of phenotypic  
22 variations including tigecycline resistance, virulence attenuation, capsular  
23 polysaccharide (CPS) reduction and biofilm formation enhancement, and then its  
24 adaptation to the host environment was increased. However, genomic analysis revealed  
25 that the strain underwent limit genetic changes. The deletion of *ramR* ribosomal binding  
26 site (RBS) mediated the tigecycline resistance, which has been described in our previous  
27 study (10). Therefore, here we further characterized other genomic changes associated  
28 with phenotypic variations and interrogated them using wet-lab experiments,  
29 transcriptome analysis and animal infection models. Our results make a connection

1 between genomic variation and within-host adaption, which will help deepen the  
2 knowledge and understanding of ST11-CRKP dissemination. In addition, results from  
3 our study also highlights the importance of monitoring the development of variation in  
4 antibiotics susceptibility and virulence of bacteria in clinical practice, considering that  
5 pathogens can rapidly adapt to host during the treatment.

6

# 1 RESULTS

## 2 The virulence of CRKP was attenuated *in vivo* during the antibiotics 3 therapy

4 The four CRKP isolates (KP-1S, KP-2S, KP-3R and KP-4R) were sequentially  
5 isolated from the urine of a 50-year-old male patient with scrotal abscess during 47  
6 days of tigecycline-containing antibiotics therapy. The initial isolates (KP-1S and  
7 KP-2S) were susceptible to tigecycline and subsequent isolates (KP-3R and KP-4R)  
8 were resistant to tigecycline. All the four CRKP isolates were resistant to 17 other  
9 antimicrobials including amikacin, gentamicin, ciprofloxacin, norfloxacin,  
10 sulfamethoxazole, nitrofurantoin, piperacillin, TXP, ceftazidime, cefuroxime, cefotaxime,  
11 ceftazidime, cefepime, cefoperazone/ sulbactam, cefmetazole, imipenem and  
12 meropenem except polymyxin B. At that time, polymyxin B was not approved by  
13 National Medical Products Administration in China.

14 As the condition of the patient did not get worse after the isolation of KP-4R, we  
15 concluded that the virulence of the subsequent isolates had reduced. To test our  
16 hypothesis, we performed an animal experiment with the four isolates. As showed in  
17 **Figure 1**, the mortality rate of mice inoculated with KP-1S (90%) or KP-2S (90%)  
18 was significantly higher ( $P < 0.05$ ) than that of mice inoculated with KP-3R (20%) or  
19 KP-4R (30%), demonstrating that the virulence of KP-3R and KP-4R had reduced.

## 20 CRKP isolates harbor virulence genes including *aerobactin*, *rmpA* 21 and *rmpA2*

22 To investigate the genomic features of the four CRKP isolates, we sequenced the  
23 whole genomes of KP-1S, KP-2S, KP-3R and KP-4R. Genomic analysis showed that  
24 all the CRKP isolates belong to the KL64-ST11, and all of them harbor  
25 carbapenemase-encoding gene *bla*<sub>KPC-2</sub> and extended-spectrum  $\beta$ -lactamase-encoding

1 gene *bla*<sub>CTX-M-65</sub>, which confer resistance to carbapenem and cephalosporin.  
2 Furthermore, besides yersiniabactin which is usually located on the chromosome of *K.*  
3 *pneumoniae*, *aerobactin* (*iutA*iuc*ABCD*), *rmpA* and *rmpA2* that are mostly identified  
4 on a large virulence plasmid (11) were found on the genomes of all the CRKP isolates  
5 (**Table 1**), indicating that the virulence of CRKP in this study has been enhanced  
6 compared to classic ST11-CRKP. Plasmid replicon analysis was identified as  
7 ColRNAI, IncFIB(K), IncFII, IncHI1B and IncR in each CRKP isolates. Among them,  
8 IncFIB(K) and IncHI1B were usually associated with the hypervirulent plasmid in  
9 hypervirulent *K. pneumoniae*, while IncFII and IncR are usually associated with  
10 *bla*<sub>KPC-2</sub>.

## 11 **ST11-CRKP strain underwent limit genetic changes during the** 12 **period in the host**

13 Whole genome alignments showed that no genomic rearrangement has happened to  
14 KP-2S, KP-3R or KP-4R (**Figure 2A**) compared with KP-1S. We further identified  
15 the variants including SNPs and INDELS among the four CRKP isolates using KP-1S  
16 as the reference (**Figure 2B**). In KP-2S, 1 SNP and 3 INDELS were found. Among  
17 them, the SNP is a synonymous variant and all the 3 INDELS are located in the  
18 intergenic regions. In KP-3R, 11 SNPs and 13 INDELS were found. Among them, 3  
19 SNPs are synonymous variants and 8 are located in the intergenic regions. Except for  
20 the deletion containing acyltransferase (*act*) family protein, the other 11 INDELS are  
21 located in the intergenic regions. In KP-4R, 10 SNPs and 9 INDELS were found.  
22 Among them, 1 SNP is a synonymous variant and 9 are located in the intergenic  
23 regions. Like KP-3R, all the INDELS are located in the intergenic regions except for  
24 the deletion containing *act*. The instantaneous mutation rates for KP-2S, KP-3R and  
25 KP-4R are  $2.1 \times 10^{-6}$  substitutions per site per year,  $1.7 \times 10^{-5}$  substitutions per site per  
26 year and  $1.3 \times 10^{-5}$  substitutions per site per year, respectively (**Figure 2C**).

27 To explore the genetic determinants associated with the phenotypic changes,  
28 variants present in KP-3R and KP-4R, and absent in KP-1S and KP-2S were further

1 considered, and shown in **Table 2**. A total of 14 variants were exclusively present in  
2 KP-3R and KP-4R, including 8 SNPs and 6 INDELS. All of the variants are located in  
3 the intergenic regions, except for the 2,226 bp large deletion which contains *act*. The  
4 2,226 bp large deletion is located upstream of an insertion sequence *ISKpn26* which  
5 usually mediates DNA inversion or deletion in *K. pneumoniae* (12) (**Figure S1**).  
6 Besides the 2,226 bp large deletion, the 12 bp-deletion of *ramR* RBS and the 5 bp  
7 (TGTTT)-deletion 42 bp upstream of *ompK26*, other 11 variants are located either on  
8 the downstream of or far away (> 200bp) from their adjacent genes and thus were  
9 considered not essential for phenotypic changes. We previously demonstrated that the  
10 12 bp-deletion of *ramR* confers tigecycline resistance (10), and studies revealed that  
11 the impact of *ramR* on pathogenicity is limited (13, 14). Therefore, in this study, we  
12 focused on the functions of the TGTTT deletion and the *act* deletion, which likely  
13 affects the virulence of KP-3R and KP-4R.

14 **TGTTT deletion upregulated the expression of *ompK26* by destroying**  
15 **the binding site of repressor KdgR and partially reduced the**  
16 **virulence of CRKP**

17 qRT-PCR showed that *ompK26* was significantly over-expressed in KP-3R and  
18 KP-4R compared with KP-1S and KP-2S (**Figure 3A**). To validate whether the  
19 *ompK26* over-expression was caused by TGTTT deletion, *ompK26* with its native and  
20 mutant promoter regions were cloned in a T-vector to generate pMY53 and pMY54  
21 (**Figure S2**) and transformed into KP-3R $\Delta$ *ompK26* (**Figure S3**), respectively. As  
22 shown in **Figure 3B**, the transcriptional level of *ompK26* in KP-3R $\Delta$ *ompK26*/pMY54  
23 was significantly higher than that in KP-3R $\Delta$ *ompK26*/pMY53, demonstrating that the  
24 deletion of TGTTT upregulated the *ompK26* expression.

25 Given that OmpK26 belong to KdgM family, which is usually under the control  
26 of KdgR. Thus, the putative KdgR binding site upstream of *ompK26* was predicted.  
27 Result showed that TGTTT fell into the KdgR binding region (**Figure 3C**). To



1 validate the prediction, KdgR was purified (**Figure 3D**) for EMSA experiment. The  
2 results showed that KdgR can bind to the promoter region of *ompK26* (**Figure 3E**). To  
3 further demonstrate that *ompK26* was under the regulation of KdgR *in vivo*,  
4 KP-3R $\Delta$ *ompK26*/pMY53 and KP-3R $\Delta$ *ompK26*/pMY54 were complemented with a  
5 wild-type KdgR (pMY59) under the control of the arabinose-inducible promoter P<sub>BAD</sub>.  
6 As shown in **Figure 3F**, when KdgR was induced in the presence of arabinose, the  
7 transcription of *ompK26* in KP-3R $\Delta$ *ompK26*/pMY53 was significantly repressed.  
8 However, the repressive effect was not observed in KP-3R $\Delta$ *ompK26*/pMY54. These  
9 results together demonstrated that TGT<sub>TT</sub> fell into the binding region of KdgR, and  
10 the deletion of TGT<sub>TT</sub> upregulated the expression of *ompK26*.

11 To investigate the role of OmpK26 in virulence, a mouse lethality study of  
12 KP-1S, KP-3R and KP-3R $\Delta$ *ompK26* was conducted. Results showed that, though  
13 without significance, the mortality rate of KP-3R $\Delta$ *ompK26* (70%) is between that of  
14 KP-1S (80%) and KP-3R (30%) (**Figure 3G**). These results indicated that *ompK26*  
15 was associated with virulence, and overexpression of *ompK26* slightly reduced the  
16 virulence of CRKP.

### 17 ***act* is involved in the synthesis of CPS and deletion of *act* significantly** 18 **attenuated the virulence of ST11-CRKP**

19 To explore the function of *act*, the *act* mutant strain KP-1S $\Delta$ *act* was constructed  
20 (**Figure S3**) and subjected to a mouse lethality test. As shown in **Figure 4A**, the  
21 mortality rate of mice infected with KP-1S $\Delta$ *act* (20%) was significantly lower ( $P <$   
22 0.05) than that of mice infected with KP-1S (80%). No significant difference in  
23 survival rate was found between the groups of KP-1S $\Delta$ *act* and KP-3R, indicating that  
24 *act* is an important virulence factor in ST11-CRKP.

25 Interestingly, the mucoid phenotype of KP-1S $\Delta$ *act* has reduced compared with  
26 KP-1S (**Figure S4**). Given that mucoid phenotype has been associated with the  
27 production of capsule polysaccharide, the transmission electron microscopy assay was

1 performed (**Figure 4B**). Results showed that capsule production of KP-1S $\Delta act$  has  
2 reduced compared with KP-1S, demonstrating that *act* plays an important role in the  
3 synthesis of CPS in ST11-CRKP. As the capsule production of clinical isolates was  
4 inversely related to biofilm formation (15), biofilm was analyzed. Results showed that  
5 KP-1S $\Delta act$  has significantly increased the biofilm productions compared with its  
6 wild type strain (**Figure 4C**), which probably facilitates its long-term carriage and  
7 persistence in host (16).

## 8 **Transcriptome analysis identified genes affected by *act***

9 RNA-seq was employed to determine the transcriptomes of KP-1S, KP-3R,  
10 KP-1S $\Delta act$  and KP-3R $\Delta ompK26$  (**Table S3**). The heatmap showed that the  
11 transcriptome profiles of all the isolates were consistent within each group and most  
12 of the genes expressed uniformly across all the samples (**Figure 5A**). As shown in  
13 **Figure 5B**, the first principal component (PC1) and the second principal component  
14 (PC2) explained up to 91% of the variance of gene expression, indicating that only  
15 few genes were differentially expressed and contributed to phenotype changes.

16 The differentially expressed genes were identified between KP-1S $\Delta act$  and  
17 KP-1S, KP-3R $\Delta ompK26$  and KP-3R, as well as KP-3R and KP-1S (**Table S4-6**). In  
18 the group of KP-1S $\Delta act$  vs. KP-1S, 21 genes were under-expressed and 61 genes  
19 were over-expressed in KP-1S $\Delta act$ . Besides *act*, other genes including *ldhA*, *bglX*,  
20 *mtnK* and *metE* were differentially expressed (**Figure 5C**). In the group of  
21 KP-3R $\Delta ompK26$  vs. KP-3R, only *ompK26* was under-expressed in KP-3R $\Delta ompK26$ ,  
22 indicating that *ompK26* is located at the end of the pathway (**Figure 5D**). In the group  
23 of KP-3R vs. KP-1S, 115 genes were under-expressed and 66 genes were  
24 over-expressed in KP-3R (**Figure 5E**). Besides *act* and *ompK26*, *ldhA*, *bglX*, *mtnK*  
25 and *metE*, which were observed in KP-1S $\Delta act$  vs. KP-1S, were also differentially  
26 expressed.

27 COG functional analysis revealed that ‘cell wall/membrane/envelope biogenesis’  
28 was affected in KP-3R $\Delta ompK26$  vs. KP-3R (**Figure 5F**). The top three affected

1 functions in KP-1S $\Delta act$  are ‘carbohydrate transport and metabolism’, ‘amino acid  
2 transport and metabolism’, and ‘transcription’ compared with KP-1S. Interestingly,  
3 though with additional genomic differences in KP-3R, the top three affected functions  
4 in KP-3R vs. KP-1S are the same as those in KP-1S $\Delta act$  vs. KP-1S.

5 Given that differentially expressed genes presented simultaneously in  
6 KP-1S $\Delta act$  vs. KP-1S and KP-3R vs. KP-1S are more likely to be associated with the  
7 virulence phenotype, therefore, genes up-or down-regulated in KP-1S $\Delta act$  and  
8 KP-3R compared with KP-1S were identified. Besides *act*, genes including *ldhA*,  
9 *bglX*, *mtnK*, *metE*, transposon and *rpe* were down-regulated, and *nuoK* was  
10 up-regulated in KP-1S $\Delta act$  and KP-3R (**Figure 5G**). *ldhA* encodes for D-Lactate  
11 dehydrogenase A and participates in fermentative lactate dehydrogenation. *bglX*  
12 encodes for beta-glucosidase which hydrolyzes beta-D-glucosyl residues to  
13 beta-D-glucose. *mtnK* encodes for S-methyl-5-thioribose kinase and *metE* encodes for  
14 homocysteine S-methyltransferase. Both of them participated in the methionine  
15 synthase and methylation. *rpe* encodes for ribulose-phosphate 3-epimerase catalyzes  
16 the reversible epimerization of D-ribulose 5-phosphate to D-xylulose 5-phosphate,  
17 which is important for carbohydrate degradation. *nuoK* (also known as ND4L)  
18 encodes for NADH-quinone oxidoreductase subunit K and shuttles electrons from  
19 NADH to quinones in the respiratory chain. The results also showed that KP-3R  
20 yielded abundant transcripts of *ompK26*, suggesting that KdgR has a strong repressive  
21 effect on *ompK26*.

22

# 1 DISCUSSION

2 In this study of ST11-CRKP sequentially isolated from a patient with scrotal abscess,  
3 the within-host genomic dynamics were deciphered. The study begins with  
4 ST11-CRKP strain that was initially susceptible then resistant to tigecycline during  
5 tigecycline therapy. Tigecycline resistant ST11-CRKP infections are generally  
6 considered fatal in clinical for their association with high mortality and poor  
7 outcomes (17). However, in this study, the patient dramatically recovered from the  
8 fatal infection without effective medication and ST11-CRKP strains can be continually  
9 isolated from the urine of the patient. We found that the virulence of tigecycline  
10 resistant ST11-CRKP was attenuated compared to the initial tigecycline susceptible  
11 strain in the mice infection model, which restated the fitness cost of acquiring  
12 antibiotic resistance in *K. pneumoniae*. The estimated instantaneous mutation rate of  
13 ST11-CRKP in this study was  $2.1 \times 10^{-6}$ - $1.7 \times 10^{-5}$  substitutions per site per year, which  
14 is higher than the reported  $6.9 \times 10^{-7}$ - $1.8 \times 10^{-6}$  substitutions per site per year (18, 19).  
15 The mutation rate might be overestimated in this study due to the limited sampling  
16 timepoints and the continuously selective pressure from antibiotics therapy.

17 The mutations selected *in vivo* may have crucial impacts on disease outcome,  
18 therefore we analyzed genomic changes in ST11-CRKP strains to decipher the genetic  
19 basis for within-host adaptation. Studies of pathogen adaptation during infection  
20 focused predominantly on mutations within coding regions, whereas adaptive  
21 mutations in intergenic regions received less attention (20, 21). However, almost all  
22 the mutations identified in this study are located in the intergenic or regulatory  
23 regions and the functions of two intergenic mutations have been verified, which  
24 underlines the importance of intergenic mutations in within-host adaptation. A study  
25 of intergenic evolution of *Pseudomonas aeruginosa* revealed that intergenic mutations  
26 represent an important aspect of bacterial evolution in niche adaptation (22).  
27 Therefore, we considered that intergenic evolution might be a more cost-effective way  
28 than coding region evolution in the acquisition of novel phenotypes and mediating  
29 host adaptation.

1 We further analyzed the genomic mutations associated with phenotypic  
2 variations. The tigecycline resistance owing to deletion of *ramR* RBS has been  
3 discussed in our previous publication, here our focus is on two mutations, including  
4 the 5 bp (TGTTT)-deletion found on upstream of *ompK26* and the deletion containing  
5 *act*, which are likely related to virulence attenuation. We proved that the TGTTT  
6 deletion is located on the binding site of *ompK26* repressor KdgR, and the deletion  
7 increases the expression level of *ompK26* to a large extent. *ompK26* encodes for a  
8 KdgM family porin and a previous study showed that the knockout of *ompK26*  
9 increases the virulence and carbapenem resistance in *K. pneumoniae* (23). We showed  
10 that the knockout of *ompK26* slightly increases the virulence of CRKP but the  
11 Mantel-Cox log rank test showed no significance between the survival rates of  
12 KP-3R $\Delta$ *ompK26* and KP-3R infected mice. RNA-seq results showed that *ompK26* is  
13 located at the end of the pathway and no differentially expressed gene was found  
14 between KP-3R $\Delta$ *ompK26* and KP-3R besides *ompK26*.

15 *act* is located in the region of CPS synthesis gene cluster and was predicted to  
16 encode an acyltransferase family protein. CPS is present on the surface of both  
17 Gram-positive and Gram-negative bacteria and it is an important virulence factor  
18 mediating host immune response (24, 25). The acetylation of CPS is frequent (26),  
19 and studies have shown that CPS acetylation enhances antigenicity and increases  
20 immunogenicity in *Escherichia coli* (27), *Streptococcus agalactiae* (28) and *Neisseria*  
21 *meningitidis* (29). Besides, the acetylation of CPS increases mucoid colony and  
22 reduces the aptitude to biofilm formation in *E. coli* (30), which have been observed in  
23 the *act* deletion and knockout strains in our study. Previous study showed that  
24 deficiency in CPS biosynthesis increases biofilm formation, which makes the  
25 pathogens difficult to eradicate in urinary tract and facilitates dissemination (16).  
26 Research on CPS acetylation in *K. pneumoniae* type K57 showed that the acetylation  
27 enhanced the immunoreactivity of CPS and increased the induction of  
28 pro-inflammatory cytokines (31). The ST11-CRKP strains in this study belong to  
29 KL64, which was considered a virulence enhanced clone (6). Previous study of an  
30 *act*-harboring KL64 strain NCTC 9184 showed that a D-glucose of CPS was

1 acetylated (32), indicating that CPS acetylation happens in KL64 *K. pneumoniae*  
2 strains. Given the fact that *act* deletion was found in the virulence attenuated isolates  
3 and knockout of *act* reduced the virulence in mutants, we inferred that *act* likely  
4 mediated the virulence variation by acetylating the CPS in this study.

5 Genes participated in lactate dehydrogenation (*ldhA*), beta-D-glucose synthesis  
6 (*bglX*) and methylation (*mtnK* and *metE*) were found under-expressed in *act*-abolished  
7 strains. The deletion of *ldhA* in *N. meningitidis* promotes biofilm formation (33),  
8 therefore, the increased biofilm formation in *act*-abolished strains might be mediated  
9 by the low expression of *ldhA*. As D-glucose synthesis and methylation are required  
10 for CPS biosynthesis, the decreased CPS productions in *act*-abolished strains were  
11 likely caused by the low expressions of *bglX*, *mtnK* and *metE*. Besides, the functions  
12 of other differentially expressed genes, such as *rpe* and *nuoK*, in *K. pneumoniae* were  
13 undetermined and will be further explored in the future.

14 In summary, our work illustrated the within-host evolution of a  
15 worldwide-disseminated clone ST11-CRKP from a clinical case by leveraging the  
16 power of WGS and building a direct connection between the genomic variants and  
17 host adaptation by RNA-seq and molecular biology techniques. Our results provide a  
18 better understanding of the evolutionary capacity and within-host adaptation of  
19 bacteria, which will be necessary for pathogens surveillance and infection-control in  
20 the future.

21

## 22 **MATERIALS AND METHODS**

### 23 **Strains and growth conditions**

24 KP-1S, KP-2S, KP-3R and KP-4R were isolated from the urine of a patient with scrotal  
25 abscess and urinary tract infection during antibiotics treatment (10). Other strains used in  
26 this study were constructed from KP-1S and KP-3R. All strains were cultivated in  
27 lysogeny broth (LB) medium at 37 °C, information of strains as indicated in **Table S1**.

### 28 **Mouse model of intraperitoneal infection**

1 Male ICR mice (6-8 weeks old, weighing 20-25g) were infected intraperitoneally with  
2  $10^6$  CFUs of *K. pneumoniae* (10 mice/group) being harvested from the exponential  
3 growth phase. Mice were monitored for 7 days and assessed for death every 16-24 h. All  
4 animal experiments were performed following the protocols approved by the Animal  
5 Ethics Committee of Shanghai Skin Diseases Hospital.

#### 6 **Whole genome sequencing and bioinformatics analysis**

7 Genome sequencing was performed as described previously (11). Briefly, genomic DNA  
8 of KP-1S, KP-2S, KP-3R and KP-4R were extracted using bacterial genomic DNA  
9 extraction kit and sequenced using Illumina HiSeq 150-bp paired-end sequencing  
10 technologies. The sequencing reads were assembled using SPAdes V3.8 (34) with  
11 default parameters and contigs with less than 500 nucleotides were excluded. The genes  
12 were predicted and annotated using NCBI online annotation service. Genome alignments  
13 were performed by MUMmer 4 (35). The SNPs and INDELs were identified by Snippy  
14 v4.6 and CNOGpro with KP-1S as the reference. The phylogenetic relationship was  
15 constructed by the FastTree (36) based on the variants with the maximum-parsimony  
16 method. The genomic features including sequence typing, virulence genes, antimicrobial  
17 resistance genes, MLST and capsular type were analyzed by Kleborate v2.0.1. Plasmid  
18 replicons were identified by PlasmidFinder.

#### 19 **Quantitative RT-PCR (qRT-PCR)**

20 qRT-PCR was performed as described previously (10). Briefly, RNA were extracted  
21 from mid-log-phase bacterial cultures using the RNeasy mini kit (Qiagen). cDNA was  
22 synthesized using the RT reagent kit with gDNA eraser (Takara). qRT-PCR was  
23 performed using SYBR Premix ExTaq (TaKaRa) on a CFX96 Real-Time PCR Detection  
24 System (Bio-Rad). PCR primers for *ompK26* and the endogenous reference gene *rrsE*  
25 were provided in **Table S2**.

#### 26 **Construction of *ompK26* and *act* mutant**

27 Knockout of chromosomal *ompK26* and *act* was conducted as we described previously  
28 (37). Briefly, pKOBEG was transformed into KP-3R to generate Kp-3R/pKOBEG.  
29 Homology fragments of *ompK26* were amplified and inserted into the pMD-18T-hph on  
30 either side of the hygromycin gene. The recombinant plasmid was then digested by KpnI

1 and HindIII to get the final linear fragment. The final fragment was transformed into  
2 Kp-3R/pKOBEG. Mutant clones were screened by PCR using the primer pairs of  
3 internal-F/internal-R and external-F/external-R. The same method was applied to  
4 construct *act* mutant. Strategy for constructing and identification of mutant clone are  
5 shown in **Figure S3**.

### 6 **Complementation of *ompK26* with its native promoter and *kdgR* overexpression**

7 The *ompK26* and the native promoter region of KP-1S and KP-3R were amplified by  
8 *ompK26\_promoter\_F/R* (**Table S2**) and cloned into pMD-18T-hph at HindIII and KpnI  
9 sites to generate pMY53 and pMY54, respectively. pMY53 and pMY54 were  
10 electrically transformed into KP-3R $\Delta$ *ompK26* to generate KP-3R $\Delta$ *ompK26*/pMY53  
11 and KP-3R $\Delta$ *ompK26*/pMY54. Strategies for construction pMY53 and pMY54 are  
12 shown in **Figure S2**. The full-length *kdgR* was amplified from KP-1S using  
13 pBAD33\_*kdgR\_F/R* (**Table S2**) and cloned into pBAD33 to generate pMY59. pMY59  
14 was then transformed into KP-3R $\Delta$ *ompK26*/pMY53 and KP-3R $\Delta$ *ompK26*/pMY54.  
15 KP-3R $\Delta$ *ompK26*/pMY53/pMY59 and KP-3R $\Delta$ *ompK26*/pMY54/pMY59 were  
16 confirmed by qRT-PCR.

### 17 **Purification of recombinant KdgR and electrophoretic mobility shift assay** 18 **(EMSA)**

19 The full-length *kdgR* was amplified from KP-1S using pET28a\_*kdgR\_F/R* (**Table S2**)  
20 and cloned into pET-28a to generate pMY55. The KdgR-6xHis fusion protein was  
21 expressed in BL21 (DE3) with 0.2 mM of Isopropyl  $\beta$ - d-1-thiogalactopyranoside at  
22 18 °C. Protein purification was performed as previously described (10). Protein purity  
23 was confirmed by sodium dodecyl sulfate-polyacrylamide gel electrophoresis  
24 (SDS-PAGE) analysis. The promoter regions of *ompK26* were amplified using  
25 *ompK26\_prob\_F/R* (**Table S2**). The KdgR/DNA complexes were mixed, incubated,  
26 electrophoresis and imaged according to the procedure described previously (38).

### 27 **Biofilm formation and transmission electron microscopy (TEM)**

28 Biofilm production was determined as described (39). Briefly, 1 ul of overnight culture  
29 was inoculated into 100 ul of fresh LB broth in each well of untreated 96-well  
30 polystyrene plates. After 24 h incubation at 37 °C, the wells were washed four times



1 with water and 150  $\mu$ l of 0.1% crystal violet was added. After 10 min incubation, crystal  
2 violet was removed and the wells were washed six times with water. Then, 200  $\mu$ l of 80%  
3 ethanol was added and the plate was incubated for 10 min at room temperature before  
4 determining the OD<sub>595</sub> with a microplate reader. Transmission electron microscopy was  
5 performed by the Electron Microscopy Facility of Servicebio (Wuhan, China), and  
6 images were captured by HITACHI HT7800/HT7700.

### 7 **RNA sequencing and differential expression analysis**

8 Total RNA was used as input material for the RNA sample preparations. RNA  
9 sequencing libraries were prepared according to the manufacturer's protocol and  
10 sequenced on Illumina Novaseq platform. The genome and gene model annotation of  
11 KP-1S was used as the reference. The reads were mapped to the reference genome by  
12 Bowtie2 v2.4.2 (40). Differential expression analysis of two conditions/groups (three  
13 biological replicates per condition) was performed using DESeq (1.18.0) (41). P-values  
14 were adjusted using Benjamini and Hochberg's approach. Genes with adjusted P-value  
15  $<0.001$  and  $|\log_2\text{FoldChange}| >1.5$  were classified as differentially expressed. Clusters  
16 of Orthologous Groups of proteins (COGs) database was used to classify the  
17 differentially expressed genes.

### 18 **Statistical analysis**

19 Statistical analysis was performed by R. The Mantel-Cox log rank test was used to  
20 compare the Kaplan-Meier survival curves and calculate the P values. Student T test was  
21 used to compare the biofilm productions and calculate the P values.

### 22 **Data availability**

23 The sequences of KP-1S have been deposited in the DDBJ/ENA/GenBank under the  
24 bioproject PRJNA590579.

25

## 26 **ACKNOWLEDGMENTS**

27 This work was supported by the National Natural Science Foundation of China [ grant  
28 number 82072322 and 81572039], the Basic Research Project of Shanghai Science and

1 Technology Commission [grant number 15JC1403000], Central Government Guided  
2 Science and Technology Development Project [YDZX20193100002868], the Shanghai  
3 Natural Science Foundation [grant number 19ZR1442800, 15ZR1437000, 16411961300,  
4 17DZ2293300], Three-Year Initiative Plan for Strengthening Public Health System  
5 Construction in Shanghai [grant number GWV-10.2-YQ02], Clinical Research Plan of  
6 SHDC [grant number 16CR1029B] and National megaproject on key infectious diseases  
7 [grant number 2017ZX10202102-001-007].

8 M.Y., J.J. and P. Z. designed the study. M.Y. and J.J. drafted the manuscript. M.Y., C.L.,  
9 M.S., D.Z., J.Y. and Z. H. carried out experiments. J.J. conducted the bioinformatic  
10 analyses. P.Z. and X.X. raised several useful suggestions. All authors read and approved  
11 the final manuscript.

12 We declare that we have no conflicts of interests.

## 13 REFERENCE

- 14 1. Grundmann H, Glasner C, Albiger B, Aanensen DM, Tomlinson CT, Andrade AT, Canton R,  
15 Carmeli Y, Friedrich AW, Giske CG, Glupczynski Y, Gniadkowski M, Livermore DM,  
16 Nordmann P, Poirel L, Rossolini GM, Seifert H, Vatopoulos A, Walsh T, Woodford N, Monnet  
17 DL, European Survey of Carbapenemase-Producing Enterobacteriaceae Working G. 2017.  
18 Occurrence of carbapenemase-producing *Klebsiella pneumoniae* and *Escherichia coli* in the  
19 European survey of carbapenemase-producing Enterobacteriaceae (EuSCAPE): a prospective,  
20 multinational study. *Lancet Infect Dis* 17:153-163.
- 21 2. Tacconelli E, Carrara E, Savoldi A, Harbarth S, Mendelson M, Monnet DL, Pulcini C,  
22 Kahlmeter G, Kluytmans J, Carmeli Y, Ouellette M, Outterson K, Patel J, Cavalieri M, Cox  
23 EM, Houchens CR, Grayson ML, Hansen P, Singh N, Theuretzbacher U, Magrini N, Group  
24 WHOPPLW. 2018. Discovery, research, and development of new antibiotics: the WHO  
25 priority list of antibiotic-resistant bacteria and tuberculosis. *Lancet Infect Dis* 18:318-327.
- 26 3. van Duin D, Arias CA, Komarow L, Chen L, Hanson BM, Weston G, Cober E, Garner OB,  
27 Jacob JT, Satlin MJ, Fries BC, Garcia-Diaz J, Doi Y, Dhar S, Kaye KS, Earley M, Hujer AM,  
28 Hujer KM, Domitrovic TN, Shropshire WC, Dinh A, Manca C, Luterbach CL, Wang M,  
29 Paterson DL, Banerjee R, Patel R, Evans S, Hill C, Arias R, Chambers HF, Fowler VG, Jr.,  
30 Kreiswirth BN, Bonomo RA, Multi-Drug Resistant Organism Network I. 2020. Molecular and  
31 clinical epidemiology of carbapenem-resistant Enterobacterales in the USA (CRACKLE-2): a  
32 prospective cohort study. *Lancet Infect Dis* 20:731-741.
- 33 4. Bialek-Davenet S, Criscuolo A, Ailloud F, Passet V, Jones L, Delannoy-Vieillard AS, Garin B,  
34 Le Hello S, Arlet G, Nicolas-Chanoine MH, Decre D, Brisse S. 2014. Genomic definition of  
35 hypervirulent and multidrug-resistant *Klebsiella pneumoniae* clonal groups. *Emerg Infect Dis*  
36 20:1812-20.

- 1 5. Zhang R, Liu L, Zhou H, Chan EW, Li J, Fang Y, Li Y, Liao K, Chen S. 2017. Nationwide  
2 Surveillance of Clinical Carbapenem-resistant Enterobacteriaceae (CRE) Strains in China.  
3 *EBioMedicine* 19:98-106.
- 4 6. Zhou K, Xiao T, David S, Wang Q, Zhou Y, Guo L, Aanensen D, Holt KE, Thomson NR,  
5 Grundmann H, Shen P, Xiao Y. 2020. Novel Subclone of Carbapenem-Resistant *Klebsiella*  
6 *pneumoniae* Sequence Type 11 with Enhanced Virulence and Transmissibility, China. *Emerg*  
7 *Infect Dis* 26:289-297.
- 8 7. Dautzenberg MJ, Haverkate MR, Bonten MJ, Bootsma MC. 2016. Epidemic potential of  
9 *Escherichia coli* ST131 and *Klebsiella pneumoniae* ST258: a systematic review and  
10 meta-analysis. *BMJ Open* 6:e009971.
- 11 8. Gu D, Dong N, Zheng Z, Lin D, Huang M, Wang L, Chan EW, Shu L, Yu J, Zhang R, Chen S.  
12 2018. A fatal outbreak of ST11 carbapenem-resistant hypervirulent *Klebsiella pneumoniae* in a  
13 Chinese hospital: a molecular epidemiological study. *Lancet Infect Dis* 18:37-46.
- 14 9. Jousset AB, Bonnin RA, Rosinski-Chupin I, Girlich D, Cuzon G, Cabanel N, Frech H, Farfour  
15 E, Dortet L, Glaser P, Naas T. 2018. A 4.5-Year Within-Patient Evolution of a  
16 Colistin-Resistant *Klebsiella pneumoniae* Carbapenemase-Producing *K. pneumoniae*  
17 Sequence Type 258. *Clin Infect Dis* 67:1388-1394.
- 18 10. Ye M, Ding B, Qian H, Xu Q, Jiang J, Huang J, Ou H, Hu F, Wang M. 2017. In vivo  
19 development of tigecycline resistance in *Klebsiella pneumoniae* owing to deletion of the *ramR*  
20 ribosomal binding site. *Int J Antimicrob Agents* 50:523-528.
- 21 11. Ye M, Tu J, Jiang J, Bi Y, You W, Zhang Y, Ren J, Zhu T, Cao Z, Yu Z, Shao C, Shen Z, Ding  
22 B, Yuan J, Zhao X, Guo Q, Xu X, Huang J, Wang M. 2016. Clinical and Genomic Analysis of  
23 Liver Abscess-Causing *Klebsiella pneumoniae* Identifies New Liver Abscess-Associated  
24 Virulence Genes. *Front Cell Infect Microbiol* 6:165.
- 25 12. He S, Hickman AB, Varani AM, Siguier P, Chandler M, Dekker JP, Dyda F. 2015. Insertion  
26 Sequence IS26 Reorganizes Plasmids in Clinically Isolated Multidrug-Resistant Bacteria by  
27 Replicative Transposition. *mBio* 6:e00762.
- 28 13. De Majumdar S, Yu J, Fookes M, McAteer SP, Llobet E, Finn S, Spence S, Monahan A,  
29 Monaghan A, Kissenpfennig A, Ingram RJ, Bengoechea J, Gally DL, Fanning S, Elborn JS,  
30 Schneiders T. 2015. Elucidation of the *RamA* regulon in *Klebsiella pneumoniae* reveals a role  
31 in LPS regulation. *PLoS Pathog* 11:e1004627.
- 32 14. Bailey AM, Ivens A, Kingsley R, Cottell JL, Wain J, Piddock LJ. 2010. *RamA*, a member of  
33 the *AraC/XylS* family, influences both virulence and efflux in *Salmonella enterica* serovar  
34 *Typhimurium*. *J Bacteriol* 192:1607-16.
- 35 15. Petruzzi B, Briggs RE, Tatum FM, Swords WE, De Castro C, Molinaro A, Inzana TJ. 2017.  
36 Capsular Polysaccharide Interferes with Biofilm Formation by *Pasteurella multocida*  
37 Serogroup A. *mBio* 8.
- 38 16. Ernst CM, Braxton JR, Rodriguez-Ororio CA, Zagieboylo AP, Li L, Pironti A, Manson AL,  
39 Nair AV, Benson M, Cummins K, Clatworthy AE, Earl AM, Cosimi LA, Hung DT. 2020.  
40 Adaptive evolution of virulence and persistence in carbapenem-resistant *Klebsiella*  
41 *pneumoniae*. *Nat Med* 26:705-711.
- 42 17. Chiu SK, Chan MC, Huang LY, Lin YT, Lin JC, Lu PL, Siu LK, Chang FY, Yeh KM. 2017.  
43 Tigecycline resistance among carbapenem-resistant *Klebsiella pneumoniae*: Clinical  
44 characteristics and expression levels of efflux pump genes. *PLoS One* 12:e0175140.

- 1 18. Moradigaravand D, Martin V, Peacock SJ, Parkhill J. 2017. Evolution and Epidemiology of  
2 Multidrug-Resistant *Klebsiella pneumoniae* in the United Kingdom and Ireland. *mBio* 8.
- 3 19. Mathers AJ, Stoesser N, Sheppard AE, Pankhurst L, Giess A, Yeh AJ, Didelot X, Turner SD,  
4 Sebra R, Kasarskis A, Peto T, Crook D, Sifri CD. 2015. *Klebsiella pneumoniae*  
5 carbapenemase (KPC)-producing *K. pneumoniae* at a single institution: insights into  
6 endemicity from whole-genome sequencing. *Antimicrob Agents Chemother* 59:1656-63.
- 7 20. Marvig RL, Sommer LM, Molin S, Johansen HK. 2015. Convergent evolution and adaptation  
8 of *Pseudomonas aeruginosa* within patients with cystic fibrosis. *Nat Genet* 47:57-64.
- 9 21. Klemm EJ, Gkrania-Klotsas E, Hadfield J, Forbester JL, Harris SR, Hale C, Heath JN,  
10 Wileman T, Clare S, Kane L, Goulding D, Otto TD, Kay S, Doffinger R, Cooke FJ,  
11 Carmichael A, Lever AM, Parkhill J, MacLennan CA, Kumararatne D, Dougan G, Kingsley  
12 RA. 2016. Emergence of host-adapted *Salmonella* Enteritidis through rapid evolution in an  
13 immunocompromised host. *Nat Microbiol* 1:15023.
- 14 22. Khademi SMH, Sazinas P, Jelsbak L. 2019. Within-Host Adaptation Mediated by Intergenic  
15 Evolution in *Pseudomonas aeruginosa*. *Genome Biol Evol* 11:1385-1397.
- 16 23. Garcia-Sureda L, Domenech-Sanchez A, Barbier M, Juan C, Gasco J, Alberti S. 2011.  
17 OmpK26, a novel porin associated with carbapenem resistance in *Klebsiella pneumoniae*.  
18 *Antimicrob Agents Chemother* 55:4742-7.
- 19 24. Mazmanian SK, Kasper DL. 2006. The love-hate relationship between bacterial  
20 polysaccharides and the host immune system. *Nat Rev Immunol* 6:849-58.
- 21 25. Comstock LE, Kasper DL. 2006. Bacterial glycans: key mediators of diverse host immune  
22 responses. *Cell* 126:847-50.
- 23 26. Herget S, Toukach PV, Ranzinger R, Hull WE, Knirel YA, von der Lieth CW. 2008. Statistical  
24 analysis of the Bacterial Carbohydrate Structure Data Base (BCSDB): characteristics and  
25 diversity of bacterial carbohydrates in comparison with mammalian glycans. *BMC Struct Biol*  
26 8:35.
- 27 27. Torensma R, van Wijk A, Visser MJ, Bouter A, Rozenberg-Arska M, Verhoef J. 1991.  
28 Monoclonal antibodies specific for the phase-variant O-acetylated K1 capsule of *Escherichia*  
29 *coli*. *J Clin Microbiol* 29:1356-8.
- 30 28. Weiman S, Dahesh S, Carlin AF, Varki A, Nizet V, Lewis AL. 2009. Genetic and biochemical  
31 modulation of sialic acid O-acetylation on group B *Streptococcus*: phenotypic and functional  
32 impact. *Glycobiology* 19:1204-13.
- 33 29. Fiebig T, Cramer JT, Bethe A, Baruch P, Curth U, Fuhring JI, Buettner FFR, Vogel U,  
34 Schubert M, Fedorov R, Muhlenhoff M. 2020. Structural and mechanistic basis of capsule  
35 O-acetylation in *Neisseria meningitidis* serogroup A. *Nat Commun* 11:4723.
- 36 30. Mordhorst IL, Claus H, Ewers C, Lappann M, Schoen C, Elias J, Batzilla J, Dobrindt U,  
37 Wieler LH, Bergfeld AK, Muhlenhoff M, Vogel U. 2009. O-acetyltransferase gene *neuO* is  
38 segregated according to phylogenetic background and contributes to environmental  
39 desiccation resistance in *Escherichia coli* K1. *Environ Microbiol* 11:3154-65.
- 40 31. Hsu CR, Liao CH, Lin TL, Yang HR, Yang FL, Hsieh PF, Wu SH, Wang JT. 2016.  
41 Identification of a capsular variant and characterization of capsular acetylation in *Klebsiella*  
42 *pneumoniae* PLA-associated type K57. *Sci Rep* 6:31946.
- 43 32. Merrifield EH, Stephen AM. 1979. Structural studies on the capsular polysaccharide from  
44 *Klebsiella* serotype K64. *Carbohydr Res* 74:241-57.

- 1 33. Sigurlasdottir S, Wassing GM, Zuo F, Arts M, Jonsson AB. 2019. Deletion of D-Lactate  
2 Dehydrogenase A in *Neisseria meningitidis* Promotes Biofilm Formation Through Increased  
3 Autolysis and Extracellular DNA Release. *Front Microbiol* 10:422.
- 4 34. Prjibelski A, Antipov D, Meleshko D, Lapidus A, Korobeynikov A. 2020. Using SPAdes De  
5 Novo Assembler. *Curr Protoc Bioinformatics* 70:e102.
- 6 35. Marcais G, Delcher AL, Phillippy AM, Coston R, Salzberg SL, Zimin A. 2018. MUMmer4: A  
7 fast and versatile genome alignment system. *PLoS Comput Biol* 14:e1005944.
- 8 36. Price MN, Dehal PS, Arkin AP. 2009. FastTree: computing large minimum evolution trees  
9 with profiles instead of a distance matrix. *Mol Biol Evol* 26:1641-50.
- 10 37. Xu Q, Jiang J, Zhu Z, Xu T, Sheng ZK, Ye M, Xu X, Wang M. 2019. Efflux pumps AcrAB  
11 and OqxAB contribute to nitrofurantoin resistance in an uropathogenic *Klebsiella pneumoniae*  
12 isolate. *Int J Antimicrob Agents* 54:223-227.
- 13 38. Xu Q, Sheng Z, Hao M, Jiang J, Ye M, Chen Y, Xu X, Guo Q, Wang M. 2021. RamA  
14 upregulates multidrug resistance efflux pumps AcrAB and OqxAB in *Klebsiella pneumoniae*.  
15 *Int J Antimicrob Agents* 57:106251.
- 16 39. Coffey BM, Anderson GG. 2014. Biofilm formation in the 96-well microtiter plate. *Methods*  
17 *Mol Biol* 1149:631-41.
- 18 40. Langmead B, Salzberg SL. 2012. Fast gapped-read alignment with Bowtie 2. *Nat Methods*  
19 9:357-9.
- 20 41. Anders S, Huber W. 2010. Differential expression analysis for sequence count data. *Genome*  
21 *Biol* 11:R106.
- 22

# 1 TABLES AND FIGURES

2 Table 1. Genomic features of KP-1S, KP-2S, KP-3R and KP-4R

| Isolates                            | MLST | KPC   | ESBL     | <i>wzi</i>               | Yersiniabactin                      | Aerobactin              | <i>rmpA</i>                | <i>rmpA2</i>              | Plasmid Inc                                  |
|-------------------------------------|------|-------|----------|--------------------------|-------------------------------------|-------------------------|----------------------------|---------------------------|----------------------------------------------|
| KP-1S, KP-2S,<br>KP-3R and<br>KP-4R | ST11 | KPC-2 | CTX-M-65 | <i>wzi</i> <sub>64</sub> | <i>ybt</i> <sub>9</sub><br>(ICEKp3) | <i>iuc</i> <sub>1</sub> | <i>rmpA</i> -2<br>(KpVP-1) | <i>rmpA2</i> -3<br>(-47%) | ColRNAI, IncFIB(K), IncFII, IncHI1B,<br>IncR |

3

4

5 Table 2. Genomic differences among the four isolates\*

| CONTIG | POS     | KP-1S                  | KP-2S                  | KP-3R                   | KP-4R                   | Annotation <sup>#</sup>                                                                         |
|--------|---------|------------------------|------------------------|-------------------------|-------------------------|-------------------------------------------------------------------------------------------------|
| 1      | 88,828  | ATGTTT                 | ATGTTT                 | A                       | A                       | 42 bp upstream of<br><i>ompK26</i> (GK022_00450)                                                |
| 8      | 158,433 | T                      | T                      | G                       | G                       | Intergenic region of GK022_11360 and<br>GK022_11365                                             |
| 14     | 29,796  | G                      | G                      | C                       | C                       | Intergenic region of GK022_16760 and<br>GK022_16765                                             |
| 14     | 29,933  | GGA                    | GGA                    | CGC                     | CGC                     | Intergenic region of GK022_16760 and<br>GK022_16765                                             |
| 14     | 29,975  | CTTCGCTAAA<br>TGTG     | CTTCGCTAAA<br>TGTG     | GTTGTTATACG<br>CAA      | GTTGTTATACG<br>CAA      | Intergenic region of GK022_16760 and<br>GK022_16765                                             |
| 14     | 29,993  | G                      | G                      | A                       | A                       | Intergenic region of GK022_16760 and<br>GK022_16765                                             |
| 14     | 30,013  | T                      | T                      | C                       | C                       | Intergenic region of GK022_16760 and<br>GK022_16765                                             |
| 14     | 30,020  | A                      | A                      | G                       | G                       | Intergenic region of GK022_16760 and<br>GK022_16765                                             |
| 27     | 9,749   | AACCTGCGT<br>GAGG      | AACCTGCGTG<br>AGG      | A                       | A                       | 9 bp upstream of <i>ramR</i> (GK022_23275)                                                      |
| 43     | 1       | T                      | T                      | DEL:1-2,226             | DEL:1-2,226             | <i>act</i> (GK022_27640), transposase<br>(GK022_27645), small membrane<br>protein (GK022_27650) |
| 46     | 3,921   | G                      | G                      | T                       | T                       | Intergenic region of GK022_28020 and<br>GK022_28025                                             |
| 46     | 3,979   | GTTGTTATAC<br>GCAAAAAA | GTTGTTATACG<br>CAAAAAA | CTTCGCTAAAT<br>GTGAAAAG | CTTCGCTAAAT<br>GTGAAAAG | Intergenic region of GK022_28020 and<br>GK022_28025                                             |
| 46     | 4,017   | C                      | C                      | T                       | T                       | Intergenic region of GK022_28020 and<br>GK022_28025                                             |
| 46     | 4,024   | G                      | G                      | A                       | A                       | Intergenic region of GK022_28020 and<br>GK022_28025                                             |

6 \*Only the variants present in KP-3R and KP-4R, and absent in KP-1S and KP-2S are shown.

7 <sup>#</sup>GK022\_16760, GK022\_16765 and GK022\_28025 are hypothetical proteins with unknown function. GK022\_11360 is annotated  
8 as 4-carboxymuconolactone decarboxylase. GK022\_11365 is annotated as a mechanosensitive ion channel. GK022\_28020 is  
9 annotated as AbrB/MazE/SpoVT family DNA-binding domain-containing protein.

10

11 **Figure 1.** Kaplan-Meier survival curves of mice intraperitoneally challenged with *Klebsiella*  
12 *pneumoniae* strains KP-1S, KP-2S, KP-3R and KP-4R. Ten mice in each group inoculated with  
13 10<sup>6</sup> CFUs were monitored daily for 7 days. P values were calculated from the Mantel-Cox log rank  
14 test for survival curve comparison. Grey shading indicates significant values (<0.05).

15

16 **Figure 2.** Genomic analysis of KP-1S, KP-2S, KP-3R and KP-4R. A. The pairwise genome  
17 alignments of KP-1S, KP-2S, KP-3R and KP-4R. B. Genomic variants of each CRKP isolates. C.

1 The phylogenetic tree of the four CRKP isolates based on the genomic variants. The numbers  
2 above the line represented the number of mutations. Mutation rates were calculated according to  
3 the number of variations and isolation time-span.

4

5 **Figure 3.** The functional study of *ompK26*. A. Quantitative reverse transcription PCR (qRT-PCR)  
6 assessment of the transcriptional level of *ompK26* in KP-1S, KP-2S, KP-3R and KP-4R. B.  
7 qRT-PCR assessment of the transcriptional level of *ompK26* in KP-3R $\Delta$ *ompK26*/pMY53 and  
8 KP-3R $\Delta$ *ompK26*/pMY54. C. The prediction of KdgR binding site. D. KdgR-6XHis protein  
9 following affinity purification. The arrow indicates KdgR protein. E. EMSA using purified KdgR  
10 protein. KdgR decreases the migration of promotor DNA of *ompK26*. F. qRT-PCR assessment of  
11 the transcriptional level of *ompK26* in KP-3R $\Delta$ *ompK26*/pMY53/pMY59-Ara,  
12 KP-3R $\Delta$ *ompK26*/pMY53/pMY59+Ara, KP-3R $\Delta$ *ompK26*/pMY54/pMY59-Ara and  
13 KP-3R $\Delta$ *ompK26*/pMY54/pMY59+Ara. G. Kaplan-Meier survival curves of mice  
14 intraperitoneally challenged with KP-1S, KP-3R and KP-3R $\Delta$ *ompK26*. Mice were injected with  
15  $10^6$  CFUs and monitored for 7 days. P values were calculated from the Mantel-Cox log rank test  
16 for survival curve comparison. Grey shading indicates significant values (<0.05).

17

18 **Figure 4.** The functional study of *act*. A. Kaplan-Meier survival curves of mice intraperitoneally  
19 challenged with KP-1S, KP-1S $\Delta$ *act* and KP-3R. Mice were injected with  $10^6$  CFUs and  
20 monitored for 7 days. P values were calculated from the Mantel-Cox log-rank test for survival  
21 curve comparison. Grey shading indicates significant values (<0.05). B. Transmission electron  
22 microscopy of KP-1S, KP-1S $\Delta$ *act*, KP-3R and KP-3R $\Delta$ *ompK26*. One representative image from  
23 four images obtained from one section is shown. C. Biofilm formation of KP-1S, KP-1S $\Delta$ *act*,  
24 KP-3R and KP-3R $\Delta$ *ompK26* in polystyrene plates. P values were calculated from student t-test.

25

26 **Figure 5.** RNA-seq analysis of KP-1S, KP-3R, KP-1S $\Delta$ *act* and KP-3R $\Delta$ *ompK26*. A. The  
27 heatmap of transcriptional profiles of KP-1S, KP-3R, KP-1S $\Delta$ *act* and KP-3R $\Delta$ *ompK26*. B.  
28 Principal component analysis (PCA) of transcriptional profiles of KP-1S, KP-3R, KP-1S $\Delta$ *act* and  
29 KP-3R $\Delta$ *ompK26*. C. The volcano plot of differentially expressed genes in KP-1S $\Delta$ *act* vs. KP-1S.  
30 D. The volcano plot of differentially expressed genes in KP-3R $\Delta$ *ompK26* vs. KP-3R. E. The  
31 volcano plot of differentially expressed genes in KP-3R vs. KP-1S. Genes highlighted with  
32 rectangle were shared with other groups. F. COG analysis of the differentially expressed genes  
33 from each group. Genes with unknown functions were omitted. G. The transcriptional  
34 levels of genes differentially expressed in both KP-1S $\Delta$ *act* vs. KP-1S and KP-3R vs. KP-1S.

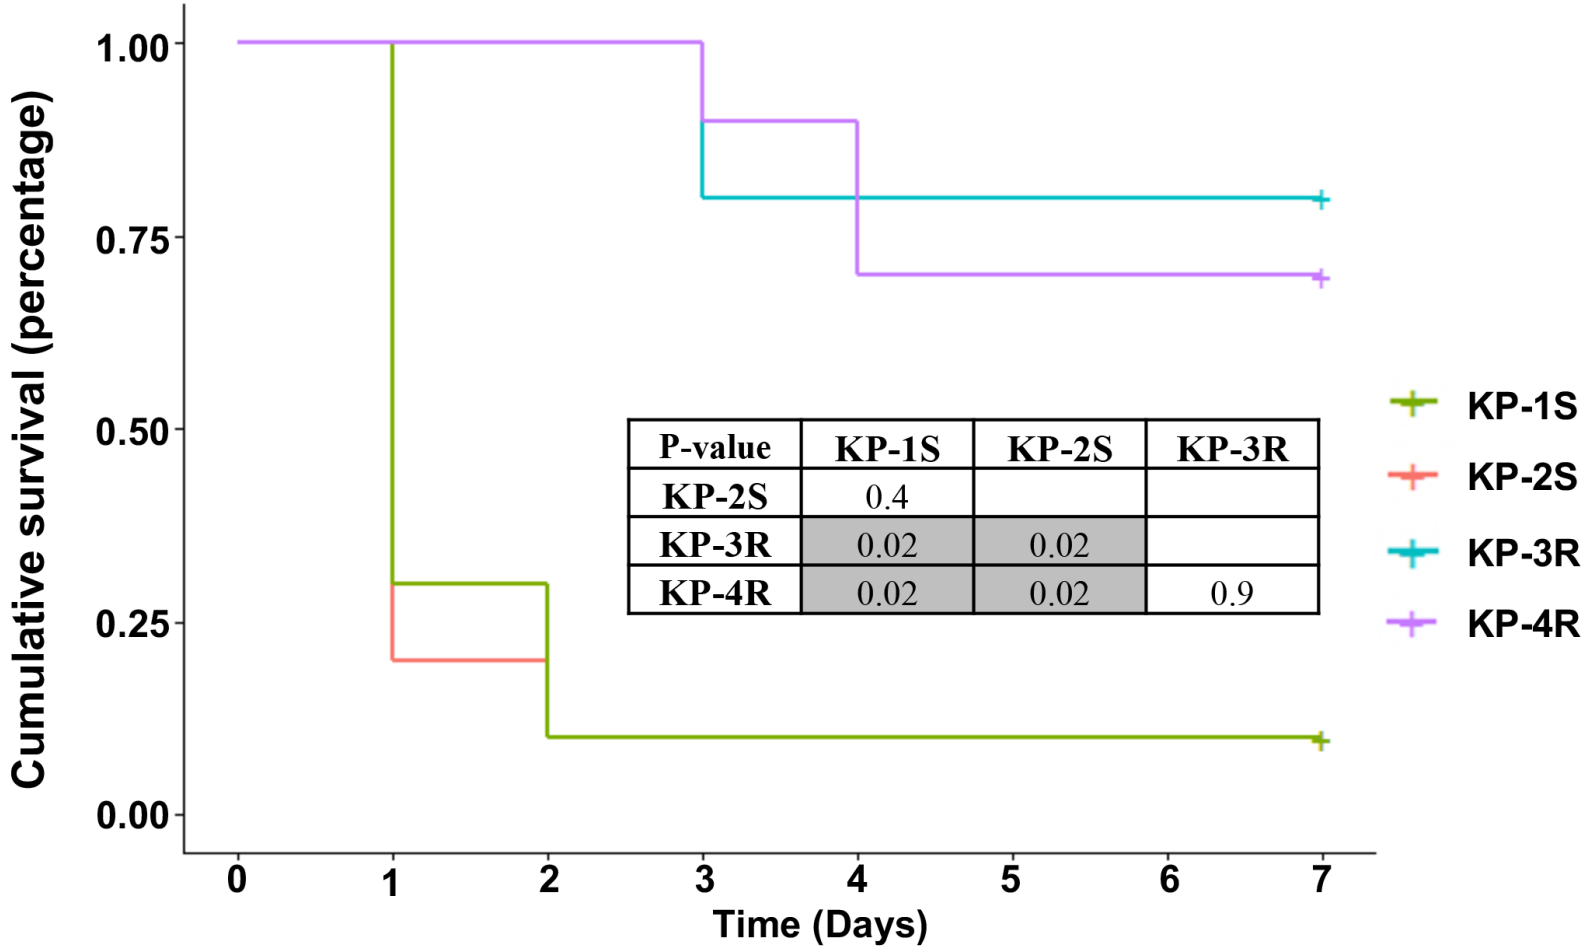



**A**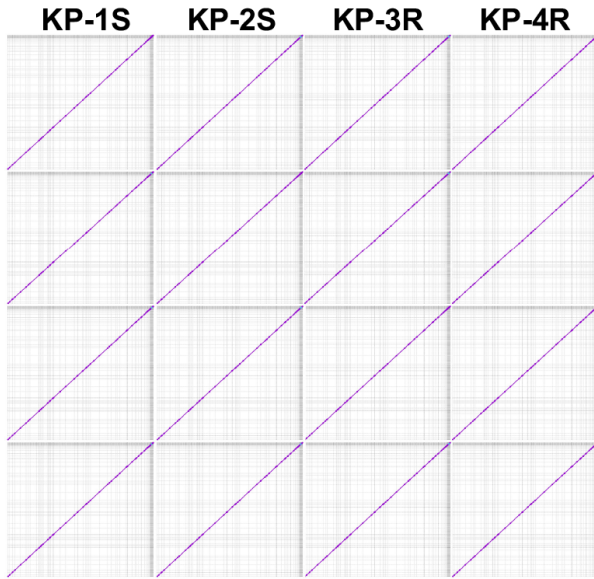**B**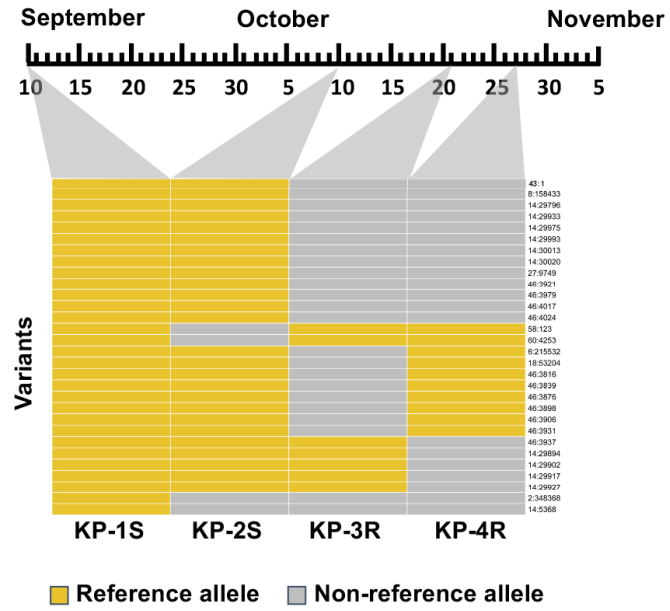**C**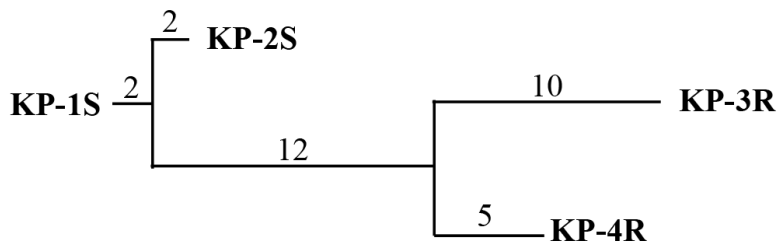

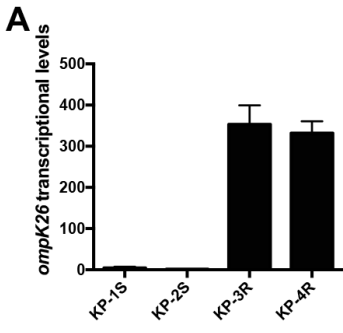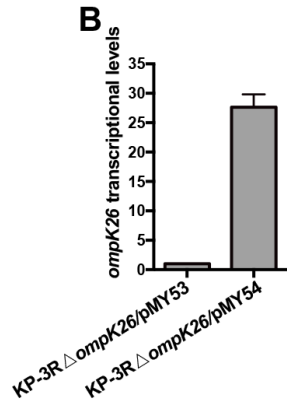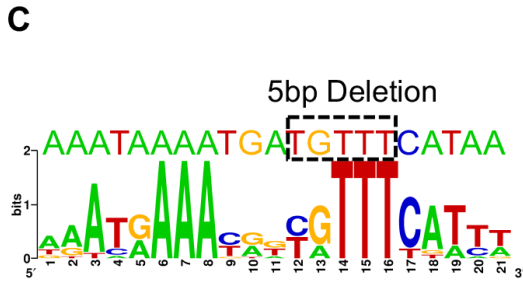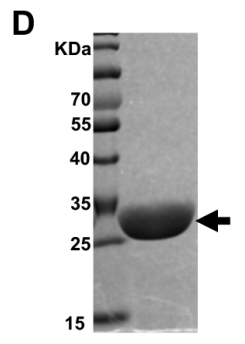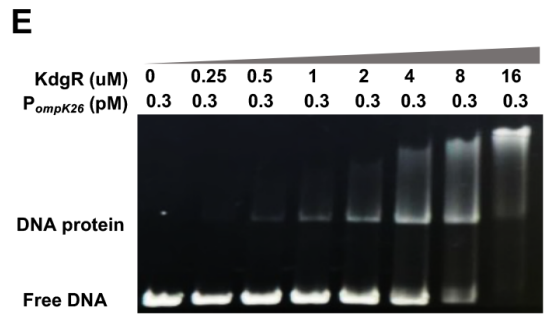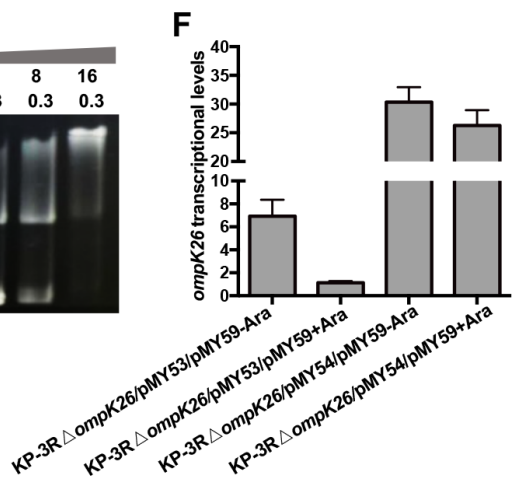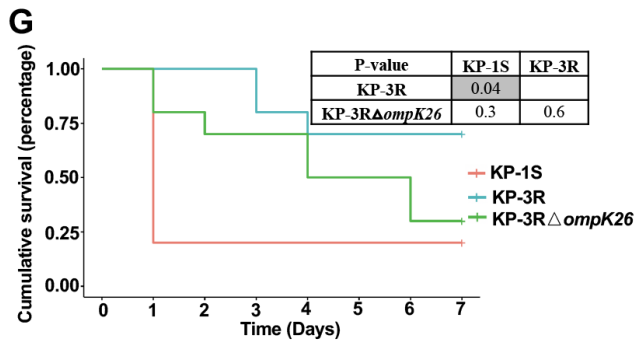

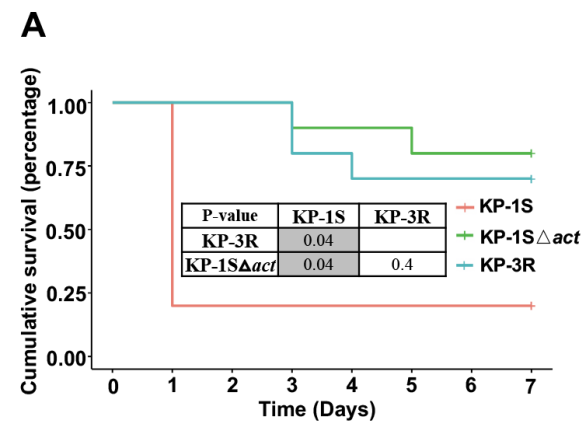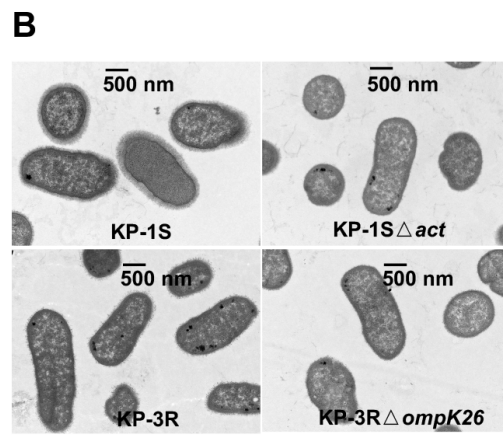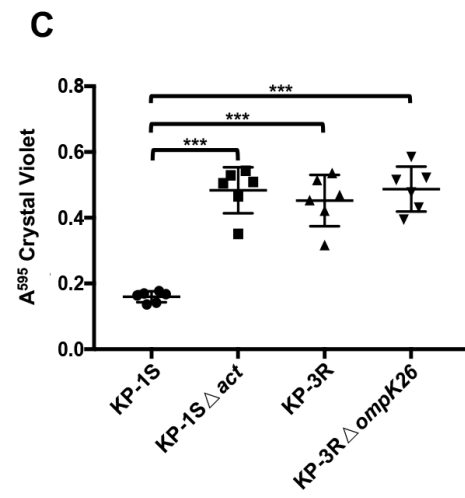

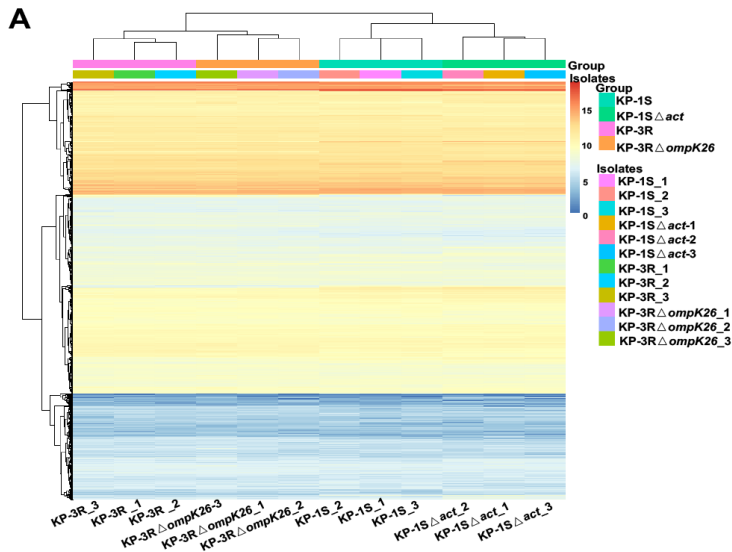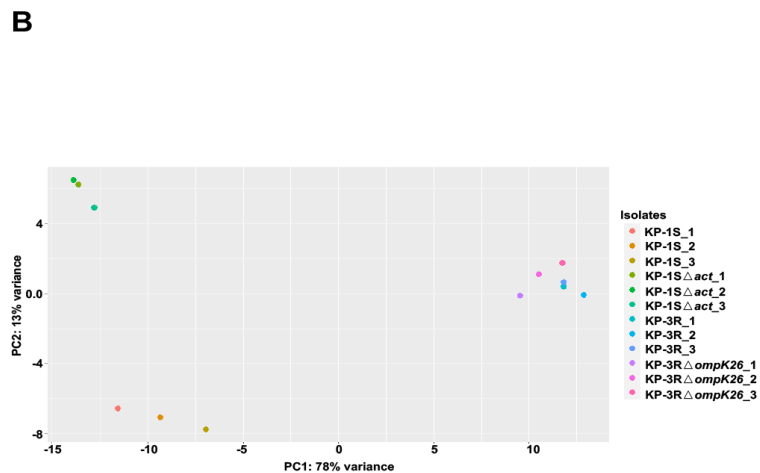

**KP-1S $\Delta$ act vs. KP-1S**

**KP-3R $\Delta$ ompK26 vs. KP-3R**

**KP-3R vs. KP-1S**

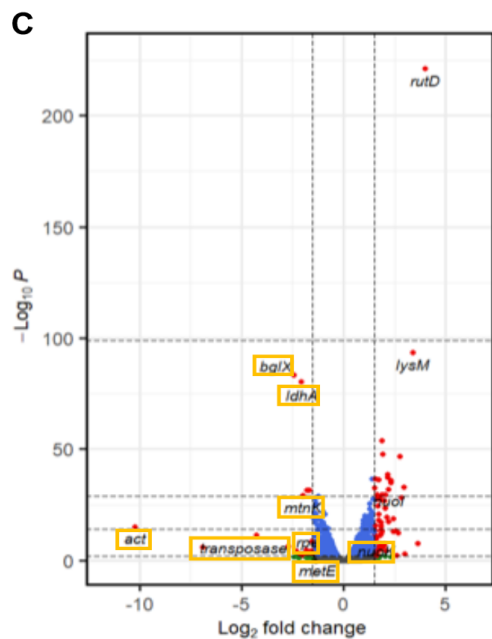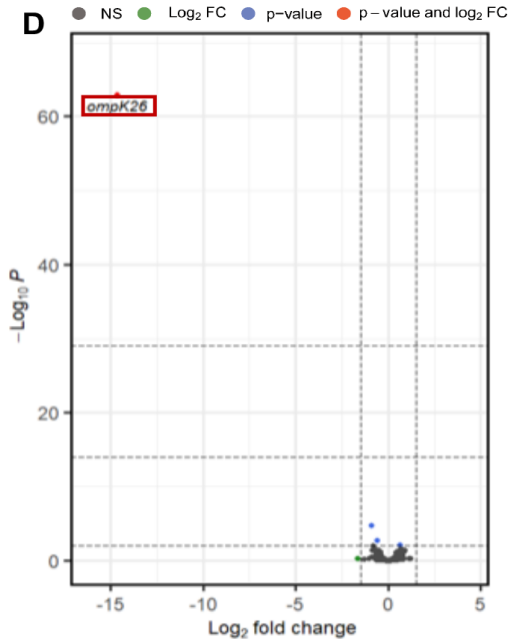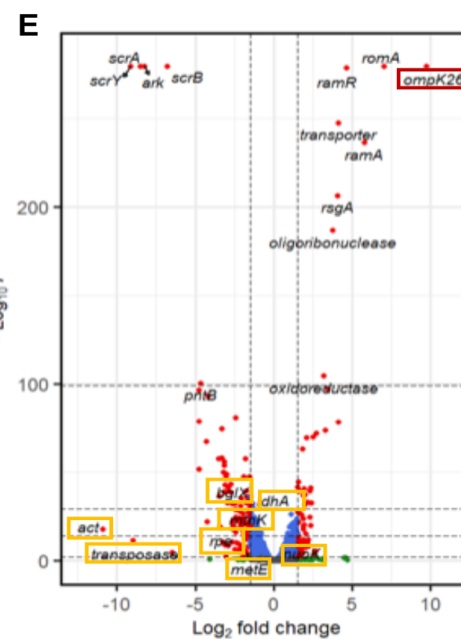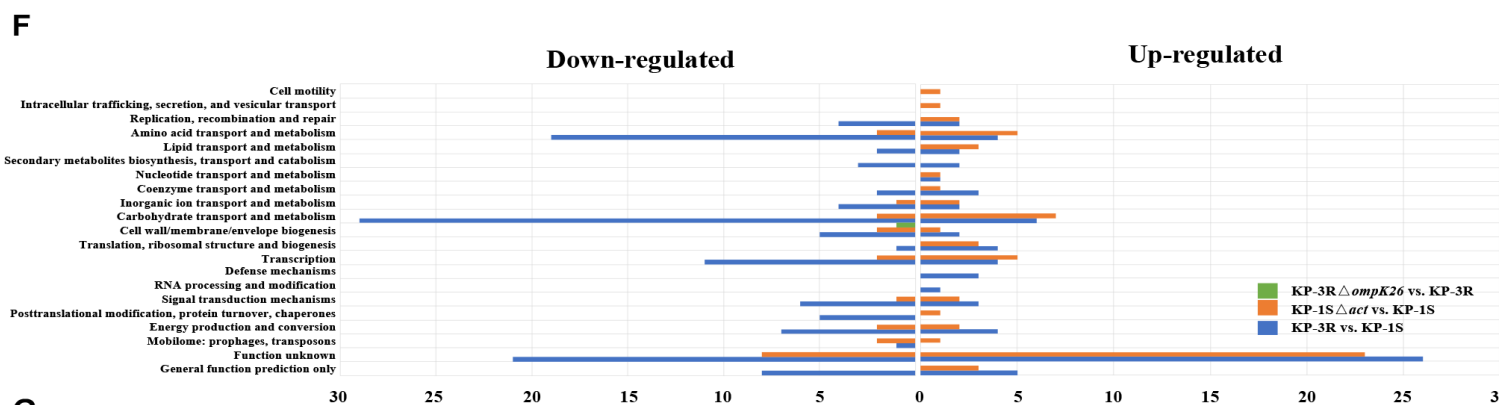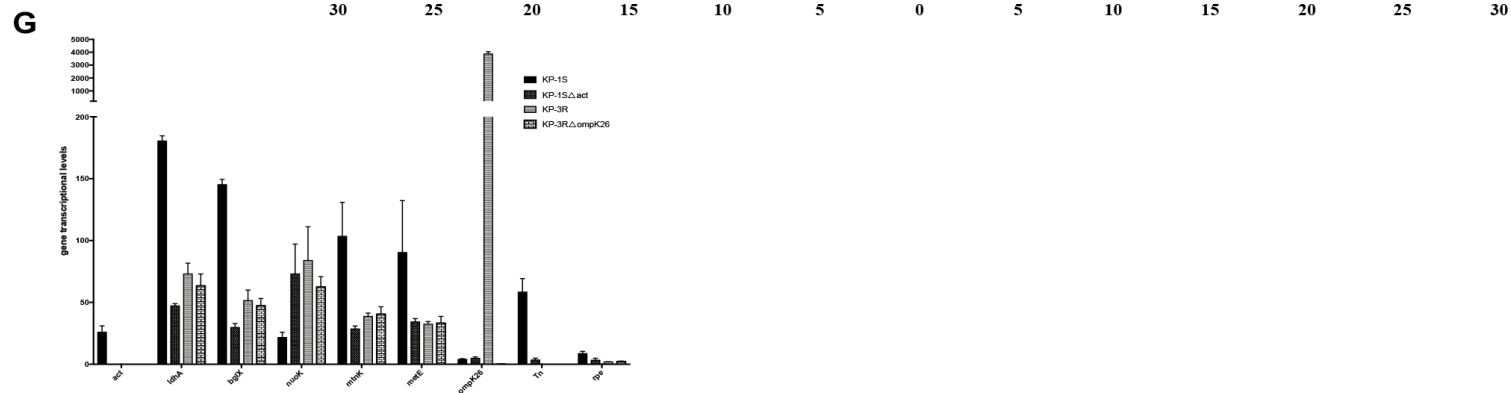

Source: http://biorxiv.org/content/10.1101/2021.05.06.443049v1.full.pdf
